# Supplementary material
Source: Springer Nature journal article supplement (https://www.springermedizin.de/resource/supplementary/12874_2005_130_MOESM3_ESM.pdf/9433930)

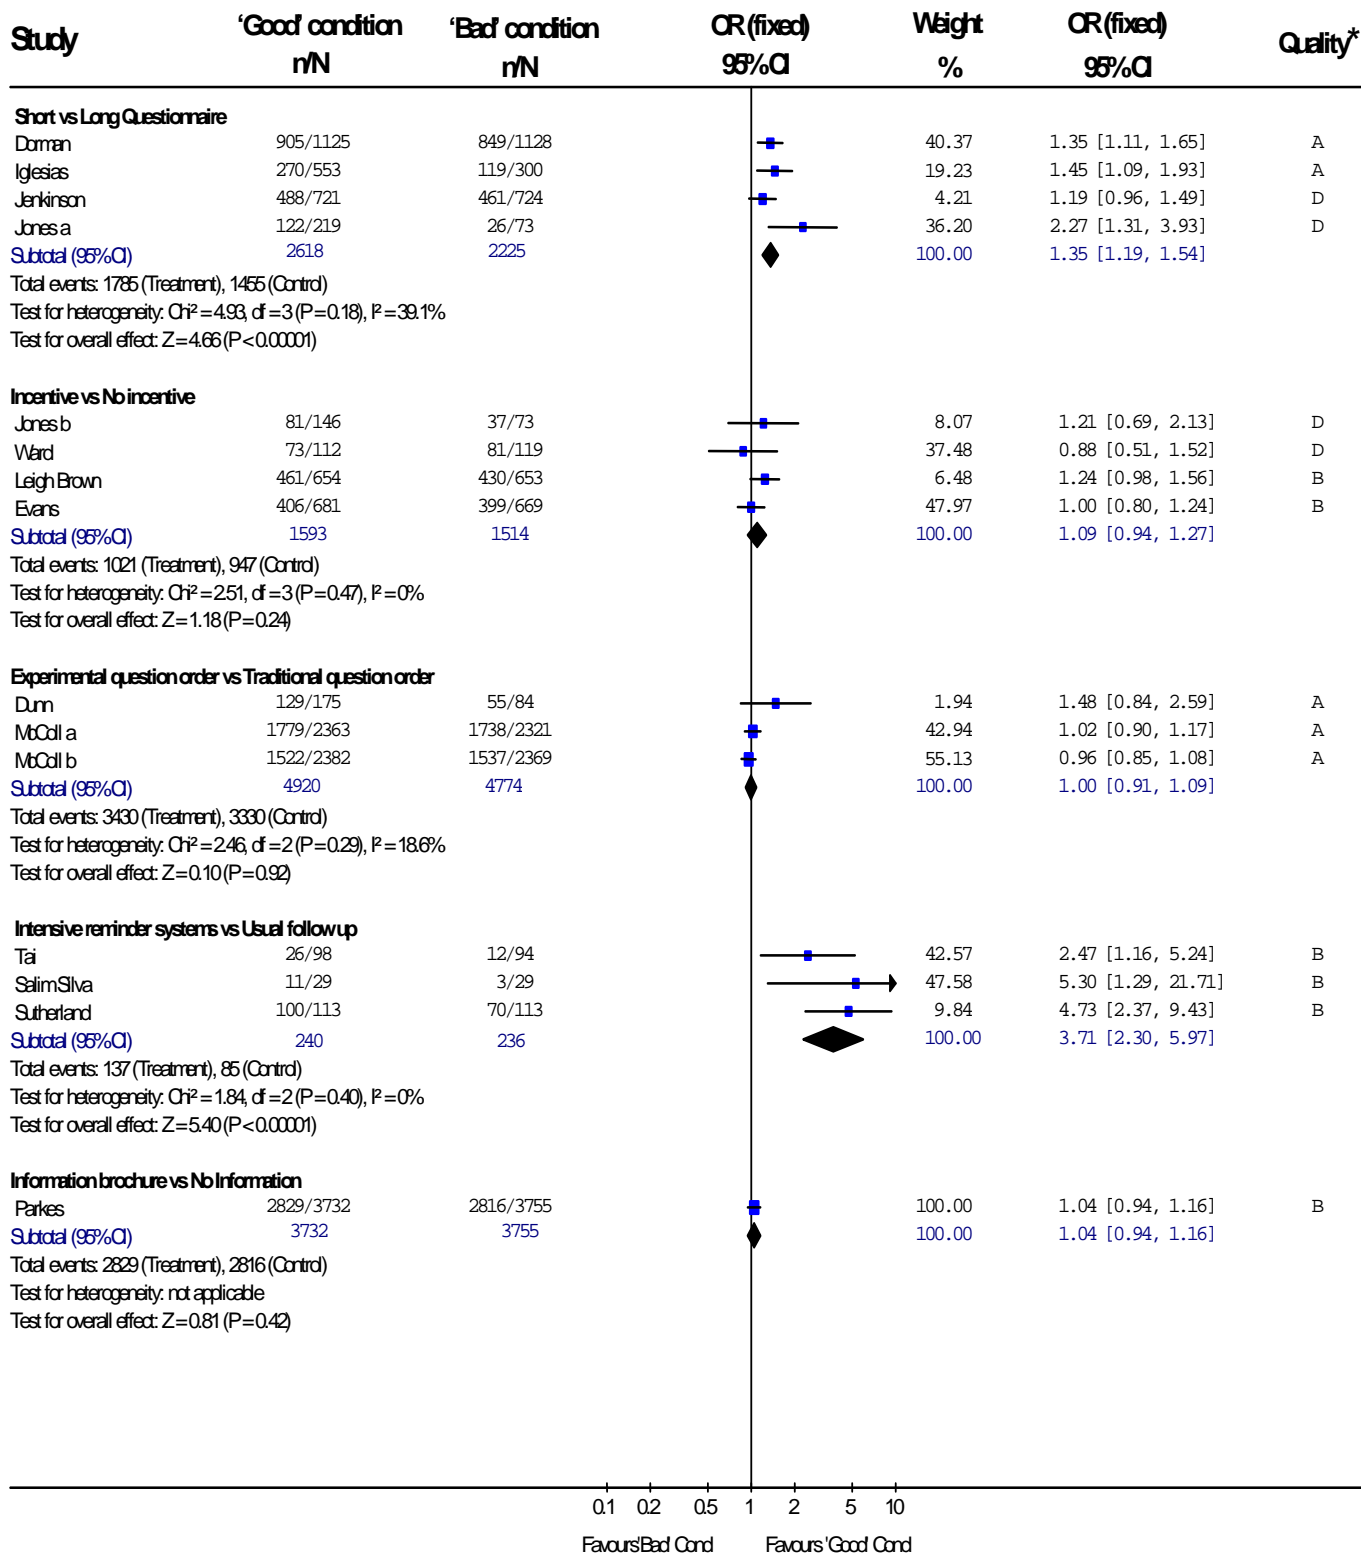

\* Quality: A= Good, B= Moderate, C= Poor, D= Unclear from report

Supplement: MOESM3 [file 9433930]
